# Supplementary material for: Eukaryotic gut community of the bat Myotis arescens in anthropized landscapes in Chile
Source: PeerJ journal article supplement (doi:10.7717/peerj.19563), 2025-06-30

NMDS based on Jaccard distance

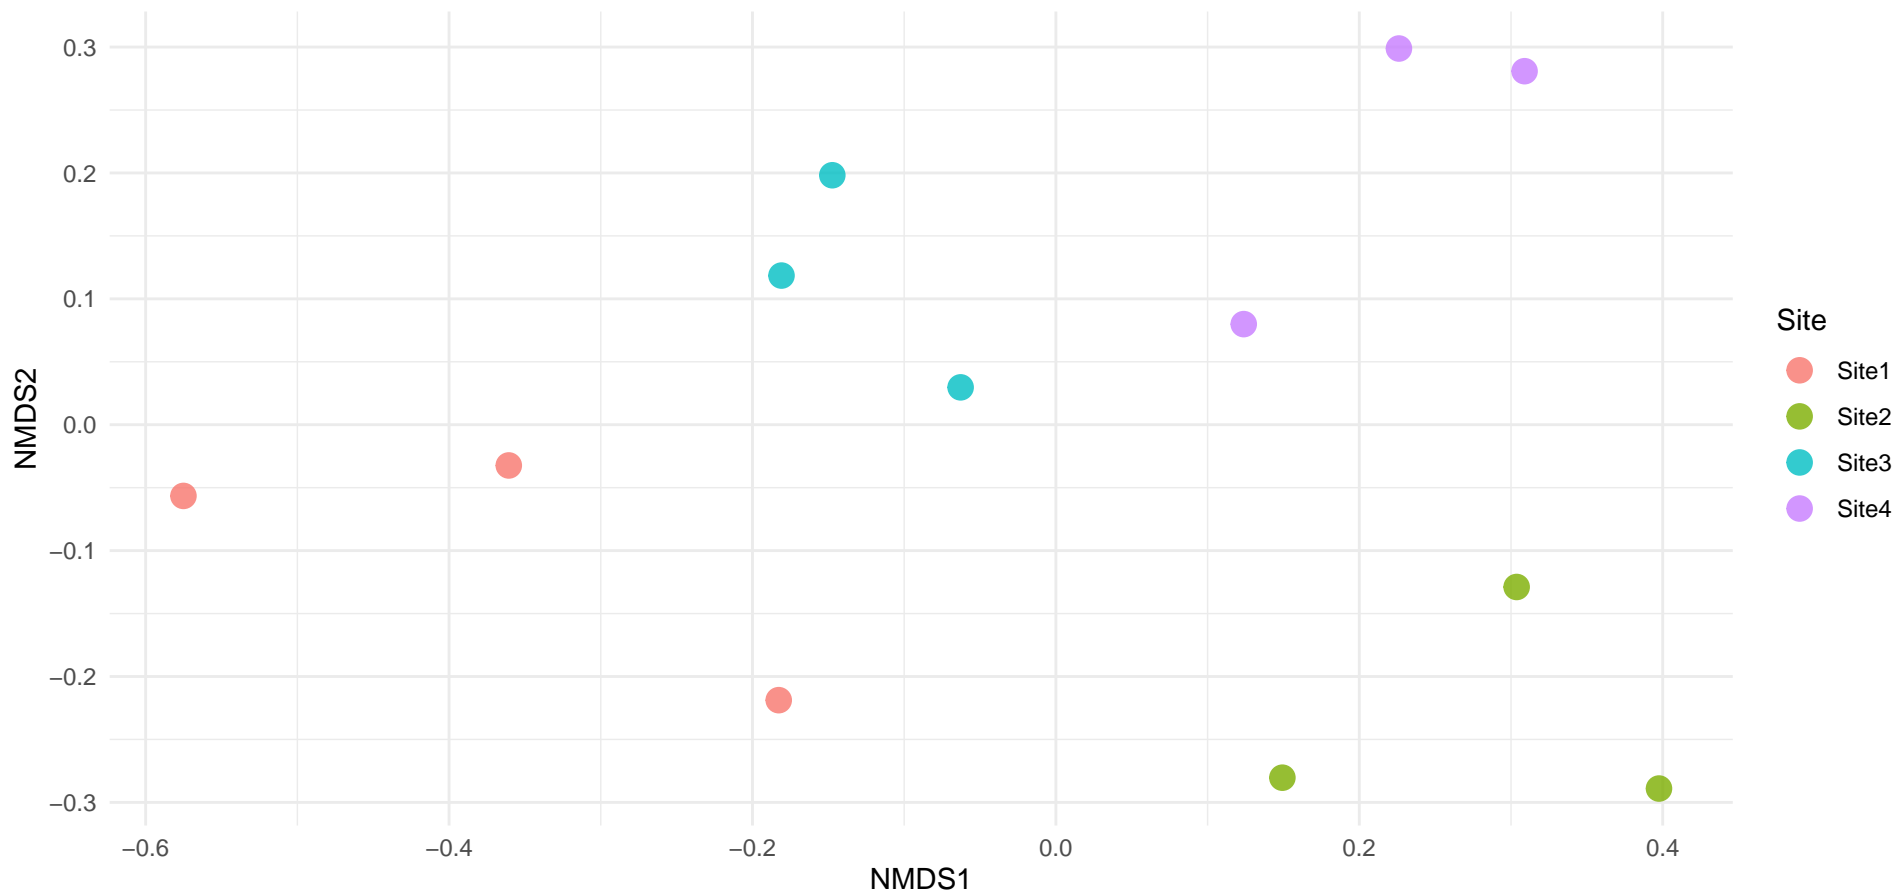

Supplement: NMDS_basado_en_Jaccard.pdf [file NMDS_basado_en_Jaccard.pdf]
